# Supplementary material
Source: Springer Nature journal article supplement (https://www.springermedizin.de/resource/supplementary/12879_2012_2061_MOESM4_ESM.pdf/9443314)

**(A)****Control Culture**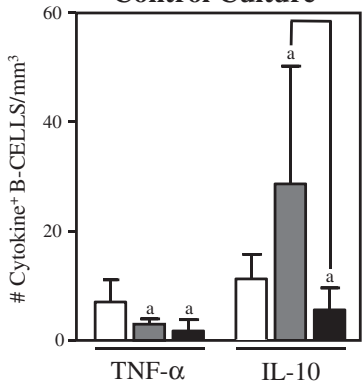**(B)****Stimulated Culture**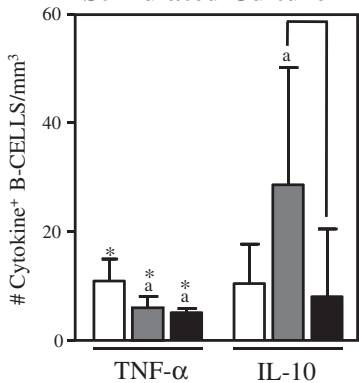

Supplement: MOESM4 [file 9443314]
